# Supplementary material for: Prognostic Value of a Ten-Gene Signature in HNSCC Patients Based on Tumor-Associated Macrophages Expression Profiling
Source: Front Oncol. 2020 Nov 18;10:569002. doi: 10.3389/fonc.2020.569002 (PMC7708322; doi:10.3389/fonc.2020.569002)
Supplement: Supplementary File 4 — Correlation analysis of differential TFs on the prognosis MGMs. [file Table_4.xlsx]

## Sheet: risk cox regression analysis
id	coef	HR
IL2RA	-0.190686	0.826392
CCL5	-0.00183773	0.998164
SLC2A6	0.0499805	1.05125
PTX3	0.00784332	1.00787
PDGFA	0.0229909	1.02326
INHBA	0.00485284	1.00486
HS3ST1	0.173648	1.18964
TGFBI	0.00108819	1.00109
GAS7	-0.049036	0.952147
CYBB	0.014002	1.0141
PTGDS	-0.00460544	0.995405
RAI14	0.00791308	1.00794

## Sheet: Correlation analysis
TFs	MGMs	cor	pvalue	Regulation
EHF	HS3ST1	0.440564	2.70639e-13	postive
EOMES	IL2RA	0.403707	3.22855e-11	postive
EOMES	CCL5	0.549056	4.3677e-21	postive
EOMES	CYBB	0.474819	1.83612e-15	postive
EOMES	PTGDS	0.465134	7.97607e-15	postive
ETS1	IL2RA	0.507304	9.35135e-18	postive
ETS1	INHBA	0.482659	5.40192e-16	postive
ETS1	CYBB	0.545838	8.19758e-21	postive
FOXP3	IL2RA	0.670801	4.82078e-34	postive
FOXP3	CCL5	0.435469	5.42873e-13	postive
FOXP3	CYBB	0.685143	5.43918e-36	postive
SNAI2	INHBA	0.568346	8.66407e-23	postive
SNAI2	TGFBI	0.529852	1.69591e-19	postive
STAT1	IL2RA	0.457109	2.60181e-14	postive
STAT1	CYBB	0.486245	3.05437e-16	postive
